# Supplementary material
Source: Elsevier journal article supplement (https://www.sciencedirect.com/science/article/pii/S1885585722000640)
Supplement: mmc1 [file S1885585722000640:mmc1.pdf]

**SUPPLEMENTARY MATERIAL**

**Figure 1 of the supplementary data.** Risk of coronary obstruction following the BASILICA technique. CO, coronary overlap.

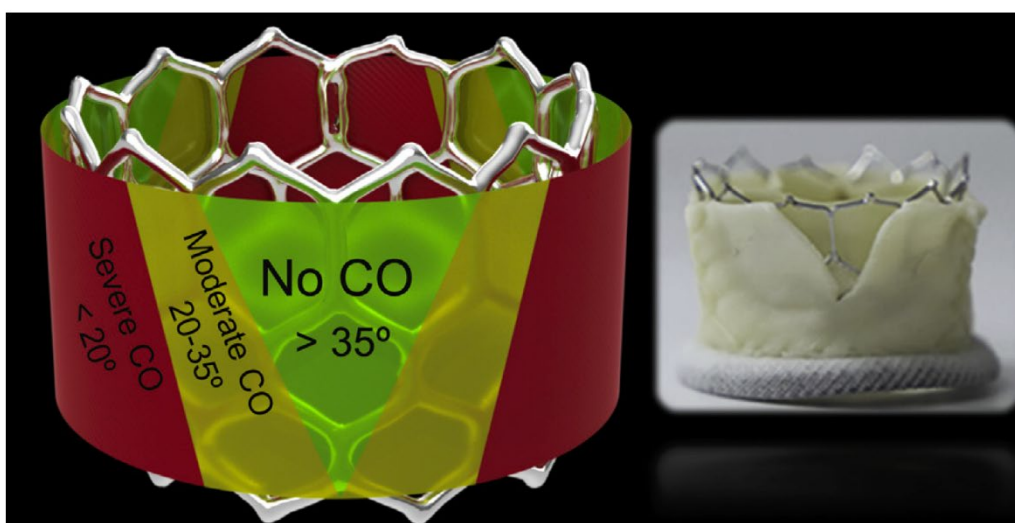

**Video 1 of the supplementary data.** Script for estimation of precise commissural alignment of the Myval device.
